# Supplementary figures and images for: RPRD1B's direct interaction with phosphorylated RNA polymerase II regulates polyadenylation of cell cycle genes and drives cancer progression
Source: Royal Society of Chemistry journal article supplement (doi:10.1039/d4cb00212a), 2025-01-01

Uncropped gel of Figure S1B

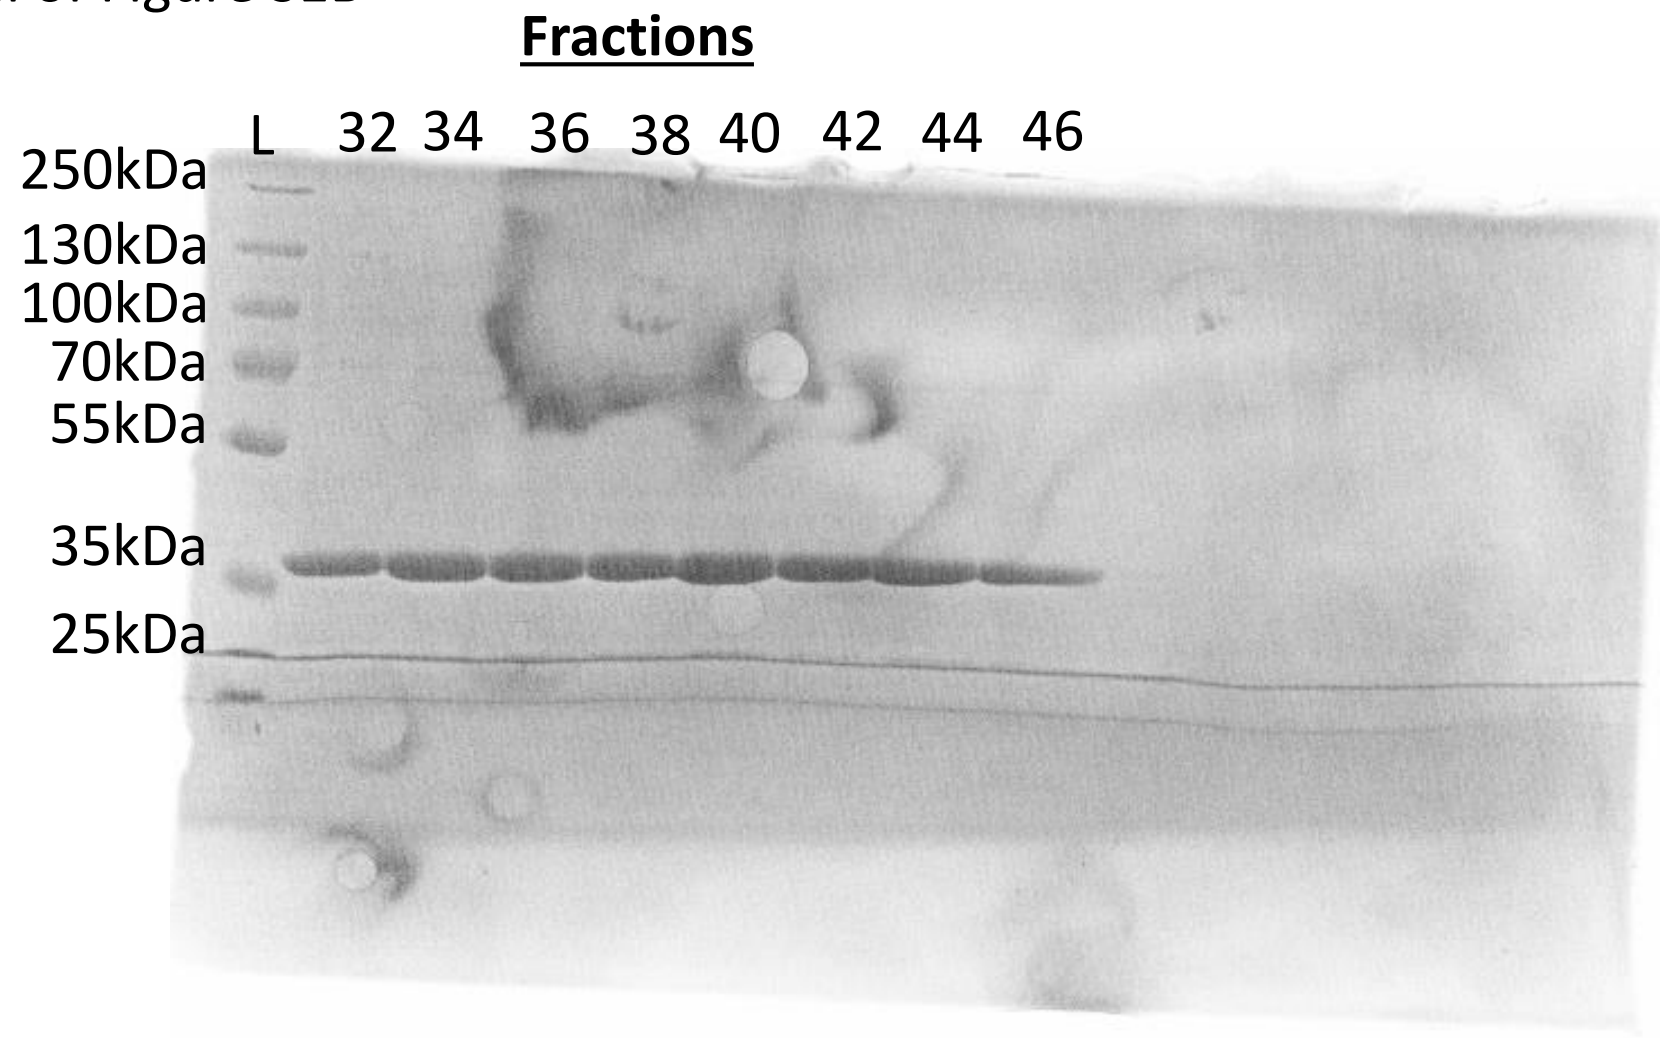

Uncropped gel of Figure S3A

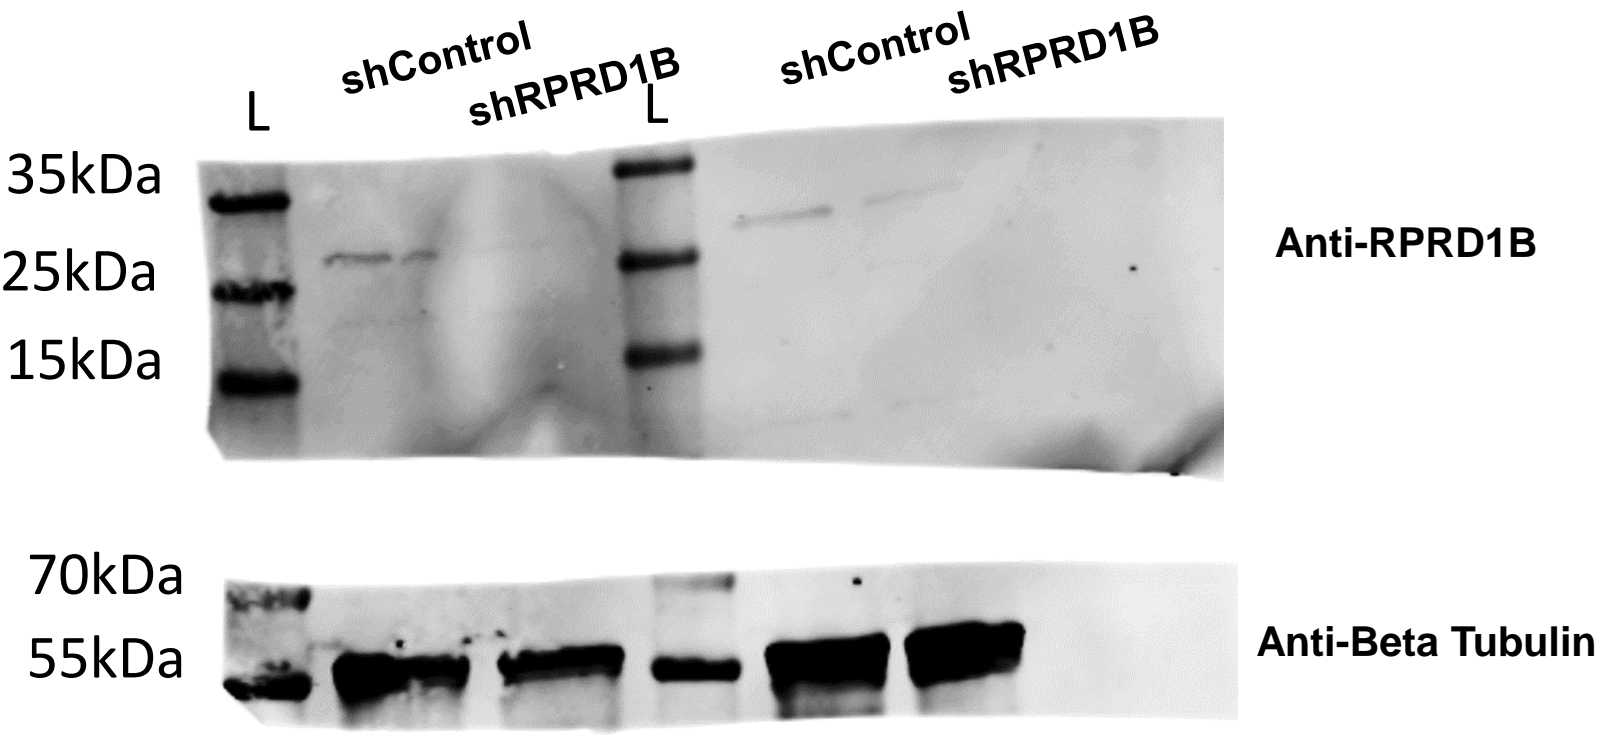

Uncropped gel of Figure S3B

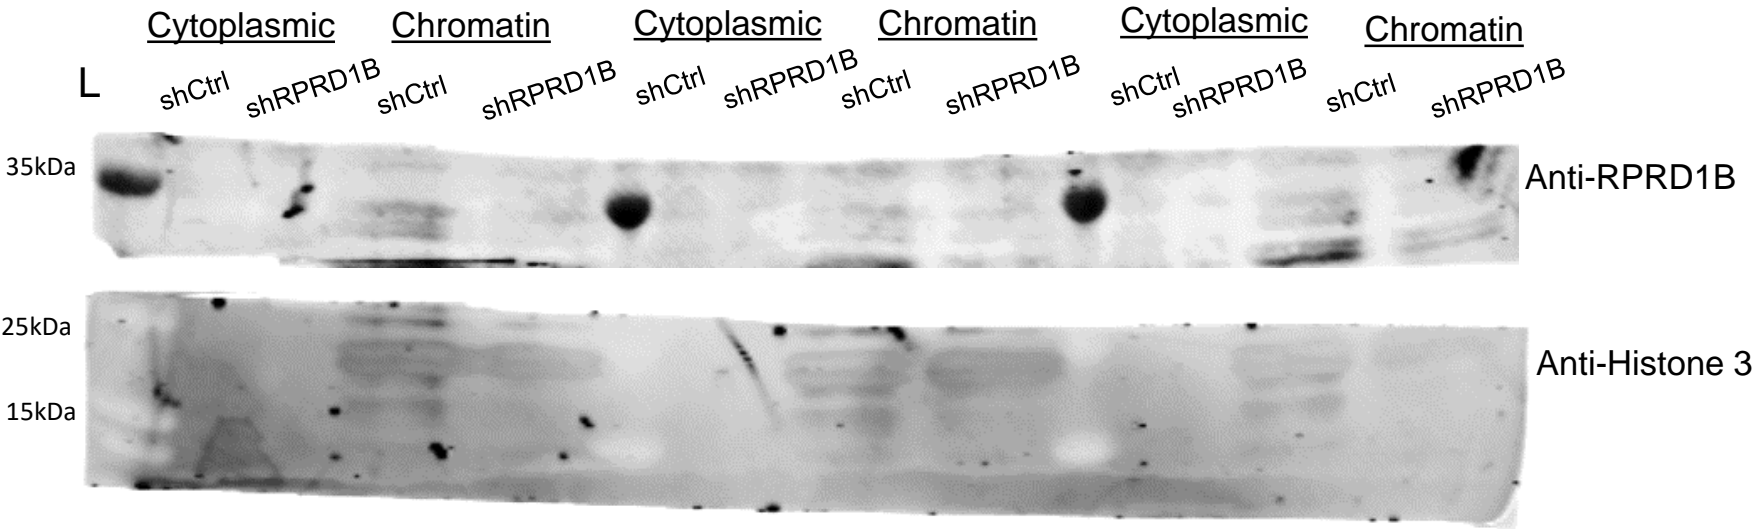

Supplement: d4cb00212a3.pdf [file d4cb00212a3.pdf]
